# Supplementary material for: Complete Genomes of Clade G6 Saccharibacteria Suggest a Divergent Ecological Niche and Lifestyle
Source: PubMed Central journal article supplement (PMC8386444; doi:10.1128/msphere.00530-21), 2021-08-11
Supplement: msphere.00530-21-sf001.pdf [file msphere.00530-21-sf001.pdf]

Figure S1

# Saccharibacteria Phylogeny

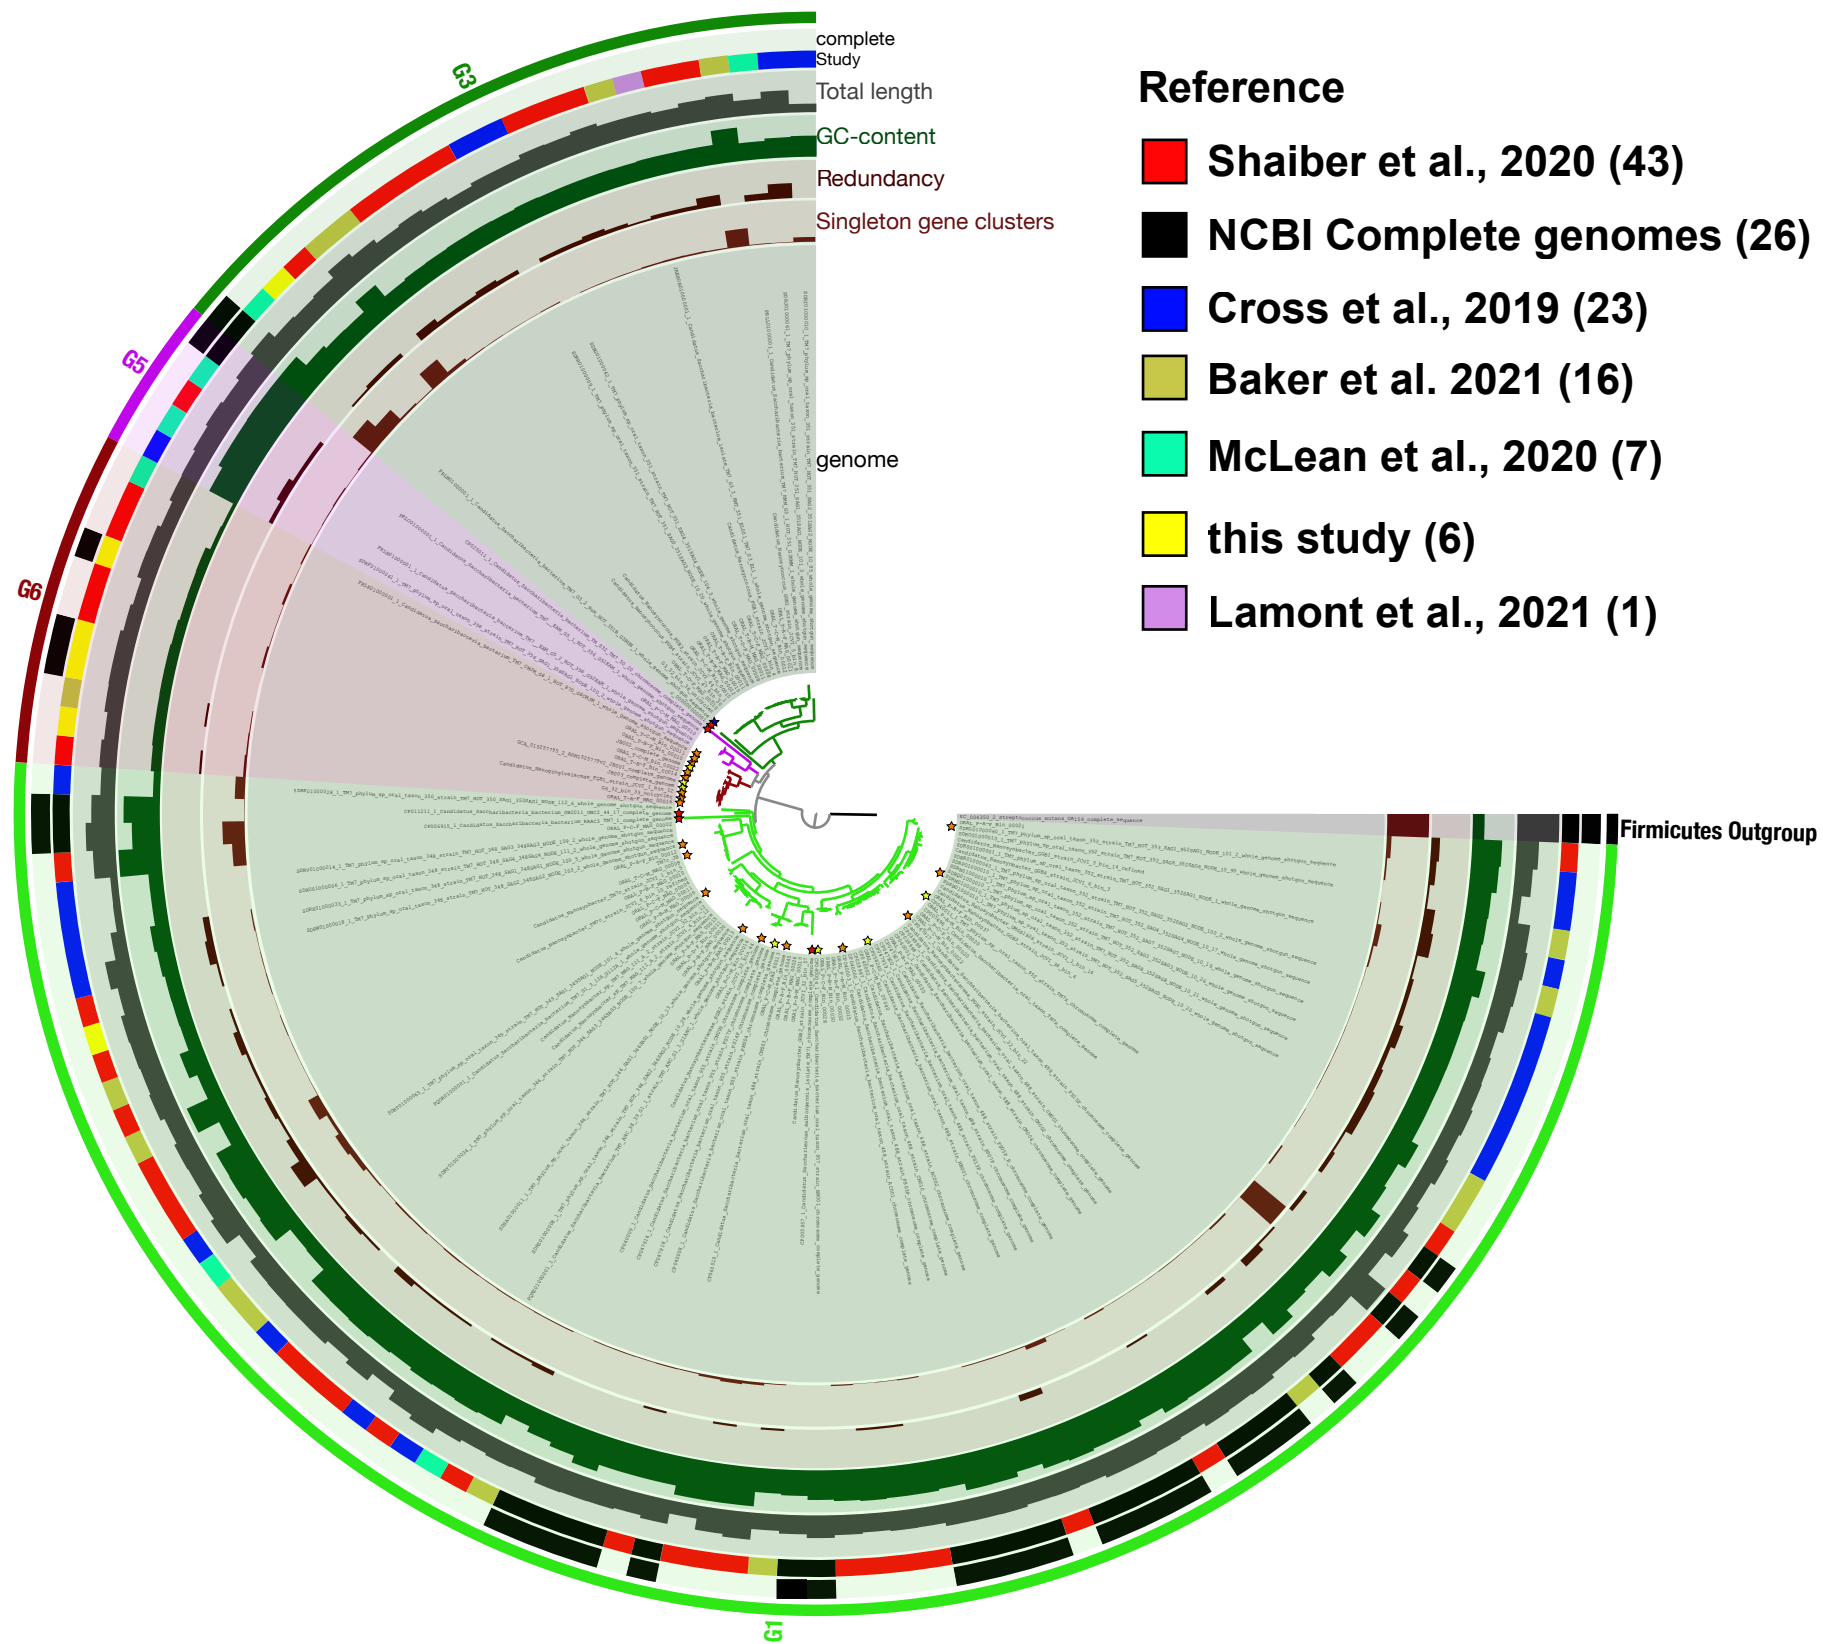

★ Used in full pangenome  
★ Used in full pangenome and complete genomes only pangenome

★ Animal rumen genome  
★ Environmental (not oral) genome
