# Supplementary material for: Complete Genomes of Clade G6 Saccharibacteria Suggest a Divergent Ecological Niche and Lifestyle
Source: PubMed Central journal article supplement (PMC8386444; doi:10.1128/msphere.00530-21), 2021-08-11

Figure S2

A

G6vsG1 full pangenome

- COG20 CATEGORY  UNKNOWN (2643)  KNOWN (1809)
- COG20 FUNCTION  UNKNOWN (2643)  KNOWN (1809)
- COG20 PATHWAY  UNKNOWN (4106)  KNOWN (346)
- KEGG Class  UNKNOWN (4325)  KNOWN (127)
- KEGG Module  UNKNOWN (4325)  KNOWN (127)
- KOfam  UNKNOWN (3386)  KNOWN (1066)
- Saccharibacteria clade  G6 (11)  G1 (14)

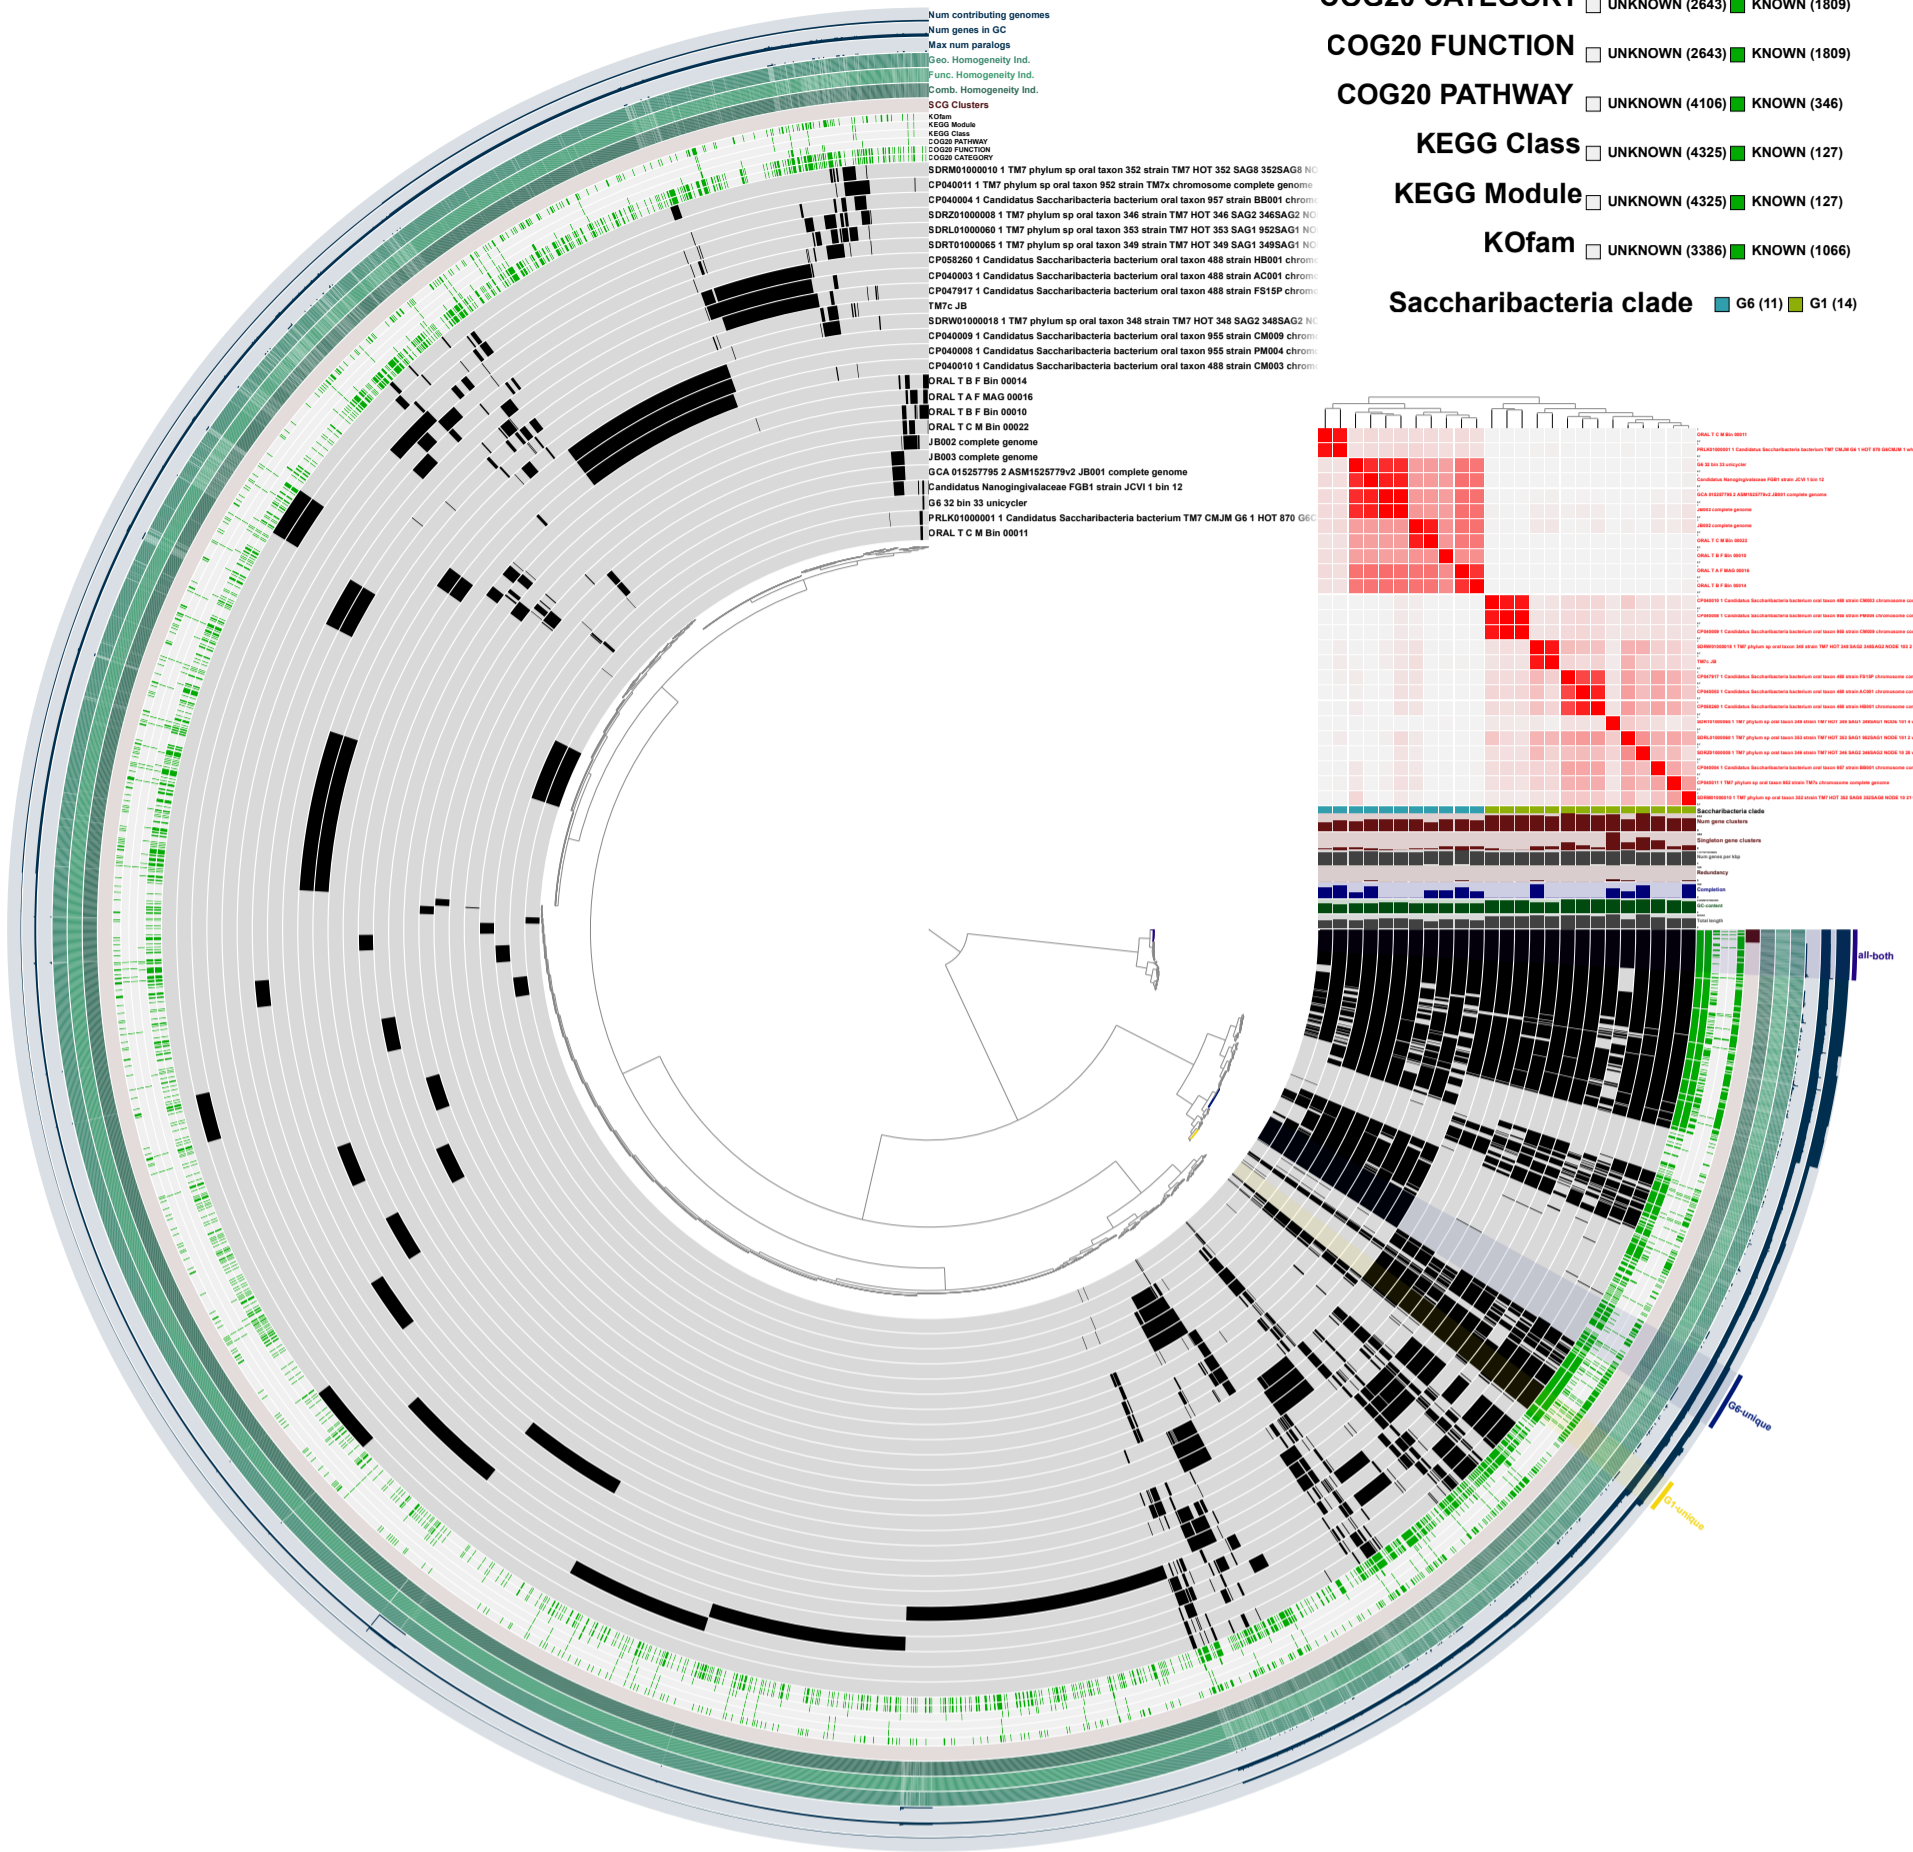

B

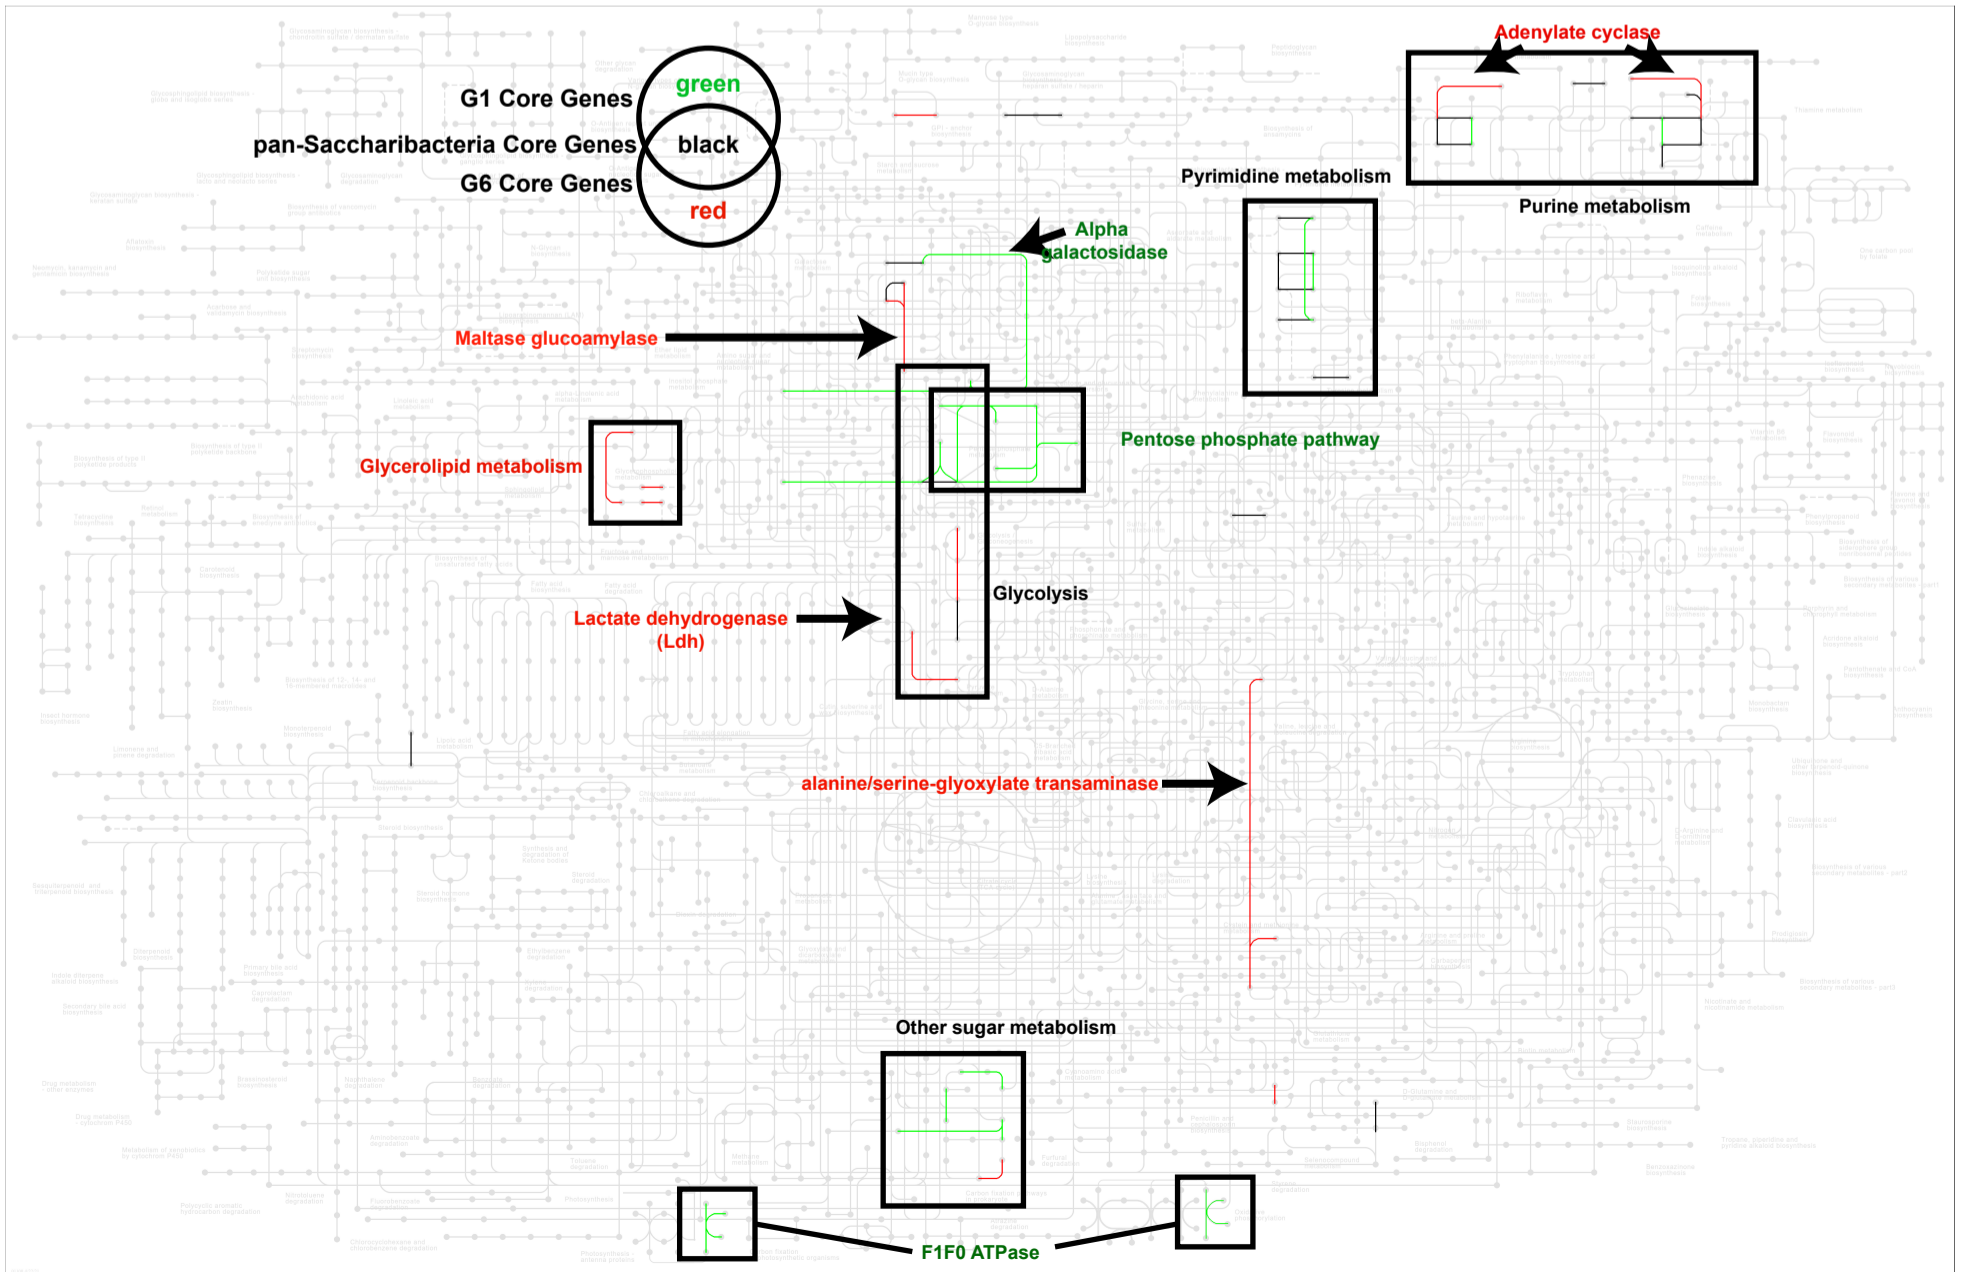

Supplement: msphere.00530-21-sf002.pdf [file msphere.00530-21-sf002.pdf]
